# Supplementary material for: Defining the Habitome: Phenotypes of Routine and Their Relationship to Health Outcomes
Source: Research Square preprint supplement (doi:10.21203/rs.3.rs-5861743/v1), 2025-04-16

## Extended Data

**Extended Data Table 1.** Summary of device ownership among cohort participants who provided their device information (n = 8,587). Note: Participants were allowed to report more than one device.

| Fitbit Model | Type              | Count |
|--------------|-------------------|-------|
| Charge 2     | Wristband (2016)  | 1505  |
| Versa 2      | Smartwatch (2019) | 1099  |
| Charge 4     | Wristband (2020)  | 979   |
| Sense        | Smartwatch (2020) | 835   |
| Charge 3     | Wristband (2018)  | 794   |
| Alta HR      | Wristband (2017)  | 597   |
| Versa        | Smartwatch (2018) | 597   |
| Charge 5     | Wristband (2021)  | 575   |
| Versa 3      | Smartwatch (2020) | 484   |
| Inspire 2    | Wristband (2020)  | 398   |
| Inspire HR   | Wristband (2019)  | 390   |
| Blaze        | Smartwatch (2016) | 296   |
| Luxe         | Wristband (2021)  | 282   |
| Versa Lite   | Smartwatch (2019) | 225   |
| Charge HR    | Wristband (2015)  | 168   |
| Ionic        | Smartwatch (2017) | 138   |
| One          | Clip (2012)       | 65    |
| Surge        | Smartwatch (2014) | 58    |
| Alta         | Wristband (2016)  | 57    |
| Flex         | Wristband (2013)  | 53    |
| Flex 2       | Wristband (2016)  | 46    |
| Inspire      | Wristband (2019)  | 34    |
| Zip          | Clip (2012)       | 32    |
| Charge       | Wristband (2014)  | 27    |
| Force        | Wristband (2013)  | <20   |
| Ace 2        | Wristband (2019)  | <20   |
| Ace 3        | Wristband (2021)  | <20   |
| Classic      | Clip (2009)       | <20   |
| Ultra        | Clip (2011)       | <20   |

**Extended Data Table 2:** Demographics of each group of clusters from the weekly patterns (columns in Figure 3B).

|                           |                           | Non-habitual<br>low wear | Non-habitual<br>high wear | Day<br>Wear | Night<br>Wear | Morning<br>Gap | 24 hr<br>Wear | Other<br>(Membership<br>< 20) |
|---------------------------|---------------------------|--------------------------|---------------------------|-------------|---------------|----------------|---------------|-------------------------------|
| <b>Total N</b>            |                           | 4796                     | 3682                      | 1,387       | 38            | 143            | 146           | 46                            |
| <b>Number of<br/>days</b> | Mean days/person          | 174±122                  | 630±106                   | 489±165     | 607±141       | 673±98         | 548±128       | 512±181                       |
| <b>Age</b>                | 18-29                     | 791                      | 383                       | 123         | <20           | <20            | <20           | <20                           |
|                           | 30-39                     | 892                      | 666                       | 223         | <20           | <20            | 36            | <20                           |
|                           | 40-49                     | 764                      | 611                       | 239         | <20           | <20            | 39            | <20                           |
|                           | 50-64                     | 1441                     | 1181                      | 507         | <20           | 59             | 42            | <20                           |
|                           | 65+                       | 890                      | 834                       | 293         | <20           | 48             | <20           | <20                           |
| <b>Sex at birth</b>       | Female                    | 3427                     | 2359                      | 1008        | <20           | 75             | 92            | 27                            |
|                           | Male                      | 1247                     | 1202                      | 347         | 22            | 60-70          | 40-50         | 17                            |
|                           | Other/Unknown             | 122                      | 121                       | 32          | <20           | <20            | <20           | <20                           |
| <b>Race</b>               | Asian                     | 137                      | 124                       | 41          | <20           | <20            | <20           | <20                           |
|                           | Black or African American | 253                      | 124                       | 112         | <20           | <20            | <20           | <20                           |
|                           | White                     | 3861                     | 3115                      | 1090        | 32            | 122            | 107           | 37                            |
|                           | Other                     | 174                      | 108                       | 36          | <20           | <20            | <20           | <20                           |
|                           | Unknown                   | 371                      | 211                       | 108         | <20           | <20            | <20           | <20                           |
| <b>Ethnicity</b>          | Not Hispanic or Latino    | 4274                     | 3371                      | 1253        | 35            | 130            | 125           | 42                            |
|                           | Hispanic or Latino        | 339                      | 167                       | 91          | <20           | <10            | <20           | <20                           |
|                           | Unknown/Other             | 183                      | 144                       | 43          | <20           | <10            | <20           | <20                           |
| <b>Income</b>             | <50k                      | 1124                     | 592                       | 206         | <20           | <20            | 21            | <20                           |
|                           | 50-75k                    | 762                      | 503                       | 219         | <20           | 24             | 29            | <20                           |
|                           | 75k-100k                  | 690                      | 558                       | 220         | <20           | 35             | 26            | <20                           |
|                           | 100-150k                  | 929                      | 809                       | 306         | <20           | 25             | 33            | <20                           |
|                           | 150-200k                  | 415                      | 442                       | 156         | <20           | <20            | <20           | <20                           |
|                           | >200k                     | 514                      | 522                       | 178         | <20           | <20            | <20           | <20                           |
|                           | Unknown                   | 362                      | 256                       | 102         | <20           | <20            | <20           | <20                           |

**Extended Data Table 3.** Chosen clinical outcomes based on the BRFSS, their corresponding question from BRFSS, and the list of Observational Medical Outcomes Partnership (OMOP) concept IDs used to define each clinical outcome.

| Clinical Outcome                             | BRFSS Question                                                                                                                                                                                                                                                                                                            | OMOP                                                                                                                                                                                                                                                                                                                                                                                                                                                                                                            |
|----------------------------------------------|---------------------------------------------------------------------------------------------------------------------------------------------------------------------------------------------------------------------------------------------------------------------------------------------------------------------------|-----------------------------------------------------------------------------------------------------------------------------------------------------------------------------------------------------------------------------------------------------------------------------------------------------------------------------------------------------------------------------------------------------------------------------------------------------------------------------------------------------------------|
| Heart attack                                 | (Ever told) (you had) heart attack, also called a myocardial infarction?                                                                                                                                                                                                                                                  | 4329847                                                                                                                                                                                                                                                                                                                                                                                                                                                                                                         |
| Angina                                       | (Ever told) (you had) angina or coronary heart disease?                                                                                                                                                                                                                                                                   | 317576, 321318, 36712983                                                                                                                                                                                                                                                                                                                                                                                                                                                                                        |
| Stroke                                       | (Ever told) (you had) a stroke.                                                                                                                                                                                                                                                                                           | 197303, 36684840, 37395574, 37395575, 381316, 4045734, 40479572, 40480946, 40481354, 40481389, 40482266, 40482301, 40484101, 40484910, 4090122, 4110196, 4112022, 4116269, 42535112, 42535113, 42535114, 42535416, 42535417, 42535419, 42535459, 42535460, 42535461, 42535511, 42535512, 42539166, 42539195, 42539262, 43530623, 43530742, 43531610, 443465, 443525, 443551, 44782753, 44782781, 761785, 761789, 761790, 761792, 761793, 761794, 761795, 761796, 761797, 761798, 762340, 762344, 764721, 765568 |
| Asthma                                       | (Ever told) (you had) asthma?                                                                                                                                                                                                                                                                                             | 317009                                                                                                                                                                                                                                                                                                                                                                                                                                                                                                          |
| Skin cancer, not melanoma                    | (Ever told) (you had) skin cancer that is not melanoma?                                                                                                                                                                                                                                                                   | 138102, 435506                                                                                                                                                                                                                                                                                                                                                                                                                                                                                                  |
| Cancer                                       | (Ever told) (you had) melanoma or any other types of cancer?                                                                                                                                                                                                                                                              | 443392                                                                                                                                                                                                                                                                                                                                                                                                                                                                                                          |
| Chronic obstructive pulmonary disease (COPD) | (Ever told) (you had) C.O.P.D. (chronic obstructive pulmonary disease), emphysema or chronic bronchitis?                                                                                                                                                                                                                  | 255573, 255841, 261325                                                                                                                                                                                                                                                                                                                                                                                                                                                                                          |
| Depressive disorder                          | (Ever told) (you had) a depressive disorder (including depression, major depression, dysthymia, or minor depression)?                                                                                                                                                                                                     | 433440, 440383                                                                                                                                                                                                                                                                                                                                                                                                                                                                                                  |
| Kidney disease                               | Not including kidney stones, bladder infection or incontinence, were you ever told you had kidney disease?                                                                                                                                                                                                                | 198124                                                                                                                                                                                                                                                                                                                                                                                                                                                                                                          |
| Arthritis                                    | (Ever told) (you had) some form of arthritis, rheumatoid arthritis, gout, lupus, or fibromyalgia? (Arthritis diagnoses include: rheumatism, polymyalgia rheumatica; osteoarthritis (not osteoporosis); tendonitis, bursitis, bunion, tennis elbow; carpal tunnel syndrome, tarsal tunnel syndrome; joint infection, etc.) | 134453, 138845, 192885, 255348, 255891, 257628, 380094, 40405599, 4147145, 4180167, 42535223, 42535408, 42535409, 4291025, 4316217, 4344158, 440674, 443744, 760925, 762150, 762151, 80180, 80809, 81379                                                                                                                                                                                                                                                                                                        |
| Type 2 diabetes mellitus                     | (Ever told) (you had) diabetes? (If 'Yes' and respondent is female, ask 'Was this only when you were pregnant?'. If Respondent says pre-diabetes or borderline diabetes, use response code 4.)                                                                                                                            | 201826                                                                                                                                                                                                                                                                                                                                                                                                                                                                                                          |

**Extended Data Table 4.** Chi-square test results for associations between wear behavior and clinical outcomes. The chi-square test statistics ( $\chi^2$ ), degrees of freedom (df), and p-values for

associations between wear behavior classifications and various clinical outcomes are reported. Significant and marginally significant results are bolded, and “S” denotes the use of Monte Carlo simulations to estimate p-values where applicable

|                                              | Non-habitual vs. Habitual |         |    | Non-habitual           |               |    | Habitual               |               |    |               |               |    |                                              |               |    |
|----------------------------------------------|---------------------------|---------|----|------------------------|---------------|----|------------------------|---------------|----|---------------|---------------|----|----------------------------------------------|---------------|----|
|                                              |                           |         |    | Low Wear vs. High Wear |               |    | Low Wear vs. High Wear |               |    | Wear Patterns |               |    | Wear Patterns and Weekday-Weekend Uniformity |               |    |
| Clinical Outcomes                            | χ²                        | p-value | df | χ²                     | p-value       | df | χ²                     | p-value       | df | χ²            | p-value       | df | χ²                                           | p-value       | df |
| Heart attack                                 | 0.00                      | 0.9515  | 1  | 0.29                   | 0.5927        | 1  | 0.00                   | 1.0000        | 1  | 4.00          | 0.1229        | S  | 9.45                                         | 0.3316        | S  |
| Angina                                       | 0.43                      | 0.5131  | 1  | 0.72                   | 0.3962        | 1  | 0.53                   | 0.4652        | 1  | 2.63          | 0.2688        | 2  | 8.63                                         | 0.4553        | S  |
| Stroke                                       | 0.34                      | 0.5784  | S  | 0.37                   | 0.5422        | S  | 1.51                   | 0.3785        | S  | 0.84          | 1.0000        | S  | 4.26                                         | 0.6943        | S  |
| Asthma                                       | 0.07                      | 0.7966  | 1  | 3.55                   | 0.0596        | 1  | 0.64                   | 0.4254        | 1  | 4.69          | 0.0960        | 2  | 15.33                                        | 0.0822        | 9  |
| Skin cancer, not melanoma                    | 1.28                      | 0.2585  | 1  | 0.64                   | 0.4244        | 1  | 2.43                   | 0.1192        | 1  | 0.21          | 0.9012        | 2  | 8.60                                         | 0.4748        | 9  |
| Cancer                                       | 0.47                      | 0.4924  | 1  | 4.75                   | <b>0.0293</b> | 1  | 0.00                   | 1.0000        | 1  | 1.67          | 0.4336        | 2  | 11.45                                        | 0.2461        | 9  |
| Chronic obstructive pulmonary disease (COPD) | 1.02                      | 0.3127  | 1  | 0.70                   | 0.4039        | 1  | 0.00                   | 0.9623        | 1  | 7.81          | <b>0.0223</b> | S  | 17.44                                        | 0.0603        | S  |
| Kidney Disease                               | 0.03                      | 0.8659  | 1  | 0.62                   | 0.4313        | 1  | 5.11                   | <b>0.0238</b> | 1  | 1.74          | 0.4190        | 2  | 10.08                                        | 0.3437        | S  |
| Depression                                   | 2.90                      | 0.0884  | 1  | 18.12                  | <b>0.0000</b> | 1  | 1.43                   | 0.2324        | 1  | 2.33          | 0.3117        | 2  | 23.57                                        | <b>0.0050</b> | 9  |
| Arthritis                                    | 0.15                      | 0.7030  | 1  | 0.02                   | 0.8827        | 1  | 0.45                   | 0.5041        | 1  | 0.83          | 0.6604        | 2  | 11.70                                        | 0.2310        | 9  |
| Type 2 diabetes mellitus                     | 0.15                      | 0.7004  | 1  | 0.60                   | 0.4371        | 1  | 0.20                   | 0.6533        | 1  | 1.63          | 0.4422        | 2  | 4.82                                         | 0.8558        | S  |

**Extended Data Table 5.** Prevalence of clinical outcomes across wear behavior groups. This table presents the prevalence rates (%) of key clinical outcomes across wear behavior groups (e.g., inconsistent vs. consistent wear) and further subgroups (e.g., high vs. low wear levels, and wear patterns such as Day Wear, Morning Gap, and All-Day Wear). Weekday-weekend uniformity is described as the row number, counted from the bottom of Figure 3B, where 0 represents the pattern with the lowest difference between weekday and weekend wear patterns, and 3 represents the highest difference. We denote the combination of wear pattern and weekday-weekend uniformity as “abbreviated wear pattern” – “weekday-weekend uniformity.” For example, “DW-0” denotes the Day Wear pattern with the lowest weekday-weekend uniformity

|                                              | Inconsistent (N=4529) |                            |                             |       | Consistent (N=990)    |                 |                |                |       |                |                         |       |                |                          |                |                |    |
|----------------------------------------------|-----------------------|----------------------------|-----------------------------|-------|-----------------------|-----------------|----------------|----------------|-------|----------------|-------------------------|-------|----------------|--------------------------|----------------|----------------|----|
|                                              |                       | Low Wear Level<br>(N=2595) | High Wear Level<br>(N=1934) |       | Day Wear (DW) (N=784) |                 |                |                |       |                | Morning Gap (MG) (N=76) |       |                | All Day Wear (AD) (N=87) |                |                |    |
| Clinical Outcomes (%)                        |                       |                            |                             |       | DW-3<br>(N=481)       | DW-2<br>(N=164) | DW-1<br>(N=90) | DW-0<br>(N=49) |       | MG-3<br>(N=44) | MG-0<br>(N=32)          |       | AD-3<br>(N=14) | AD-2<br>(N=10)           | AD-1<br>(N=38) | AD-0<br>(N=25) |    |
| Heart attack                                 | 2.23                  | 2.35                       | 2.07                        | 2.32  | 1.79                  | 2.08            | 1.83           | 0              | 2.04  | 3.95           | 4.55                    | 3.12  | 4.6            | 0                        | 0              | 5.26           | 8  |
| Angina                                       | 7.71                  | 8.02                       | 7.29                        | 8.38  | 7.78                  | 8.73            | 8.54           | 2.22           | 6.12  | 11.84          | 11.36                   | 12.5  | 11.49          | 14.29                    | 20             | 10.53          | 8  |
| Stroke                                       | 0.38                  | 0.31                       | 0.47                        | 0.51  | 0.51                  | 0.42            | 0.61           | 0              | 2.04  | 0              | 0                       | 0     | 0              | 0                        | 0              | 0              | 0  |
| Asthma                                       | 17.07                 | 18                         | 15.82                       | 16.67 | 16.58                 | 15.38           | 17.68          | 20             | 18.37 | 11.84          | 6.82                    | 18.75 | 24.14          | 21.43                    | 0              | 34.21          | 20 |
| Skin cancer, not melanoma                    | 40.72                 | 40.19                      | 41.42                       | 42.73 | 43.62                 | 45.74           | 40.85          | 41.11          | 36.73 | 42.11          | 36.36                   | 50    | 41.38          | 35.71                    | 70             | 42.11          | 32 |
| Cancer                                       | 17.02                 | 15.95                      | 18.46                       | 16.06 | 16.2                  | 18.71           | 14.63          | 8.89           | 10.2  | 18.42          | 18.18                   | 18.75 | 11.49          | 7.14                     | 20             | 15.79          | 4  |
| Chronic obstructive pulmonary disease (COPD) | 4.08                  | 4.32                       | 3.77                        | 3.33  | 2.68                  | 2.49            | 3.05           | 0              | 8.16  | 5.26           | 2.27                    | 9.38  | 8.05           | 7.14                     | 10             | 7.89           | 8  |
| Kidney Disease                               | 12.78                 | 13.14                      | 12.31                       | 12.53 | 11.22                 | 10.19           | 15.85          | 6.67           | 14.29 | 15.79          | 18.18                   | 12.5  | 13.79          | 7.14                     | 10             | 13.16          | 20 |
| Depression                                   | 24.64                 | 27.01                      | 21.46                       | 22.02 | 21.56                 | 17.67           | 21.34          | 36.67          | 32.65 | 22.37          | 22.73                   | 21.88 | 28.74          | 35.71                    | 30             | 31.58          | 20 |
| Arthritis                                    | 41.73                 | 41.62                      | 41.88                       | 41.01 | 41.2                  | 43.66           | 42.68          | 31.11          | 30.61 | 38.16          | 45.45                   | 28.12 | 36.78          | 28.57                    | 50             | 36.84          | 36 |
| Type 2 diabetes mellitus                     | 10.58                 | 10.25                      | 11.01                       | 10.1  | 9.82                  | 9.98            | 12.2           | 6.67           | 6.12  | 14.47          | 13.64                   | 15.62 | 10.34          | 14.29                    | 10             | 10.53          | 8  |

**Extended Data Figure 1. Inclusion criteria for main cohort and long-term cohort.**

The flow diagram describes the inclusion criteria applied to define the Main Cohort and the Long-Term Cohort used for visualization and clustering using Cyclust.

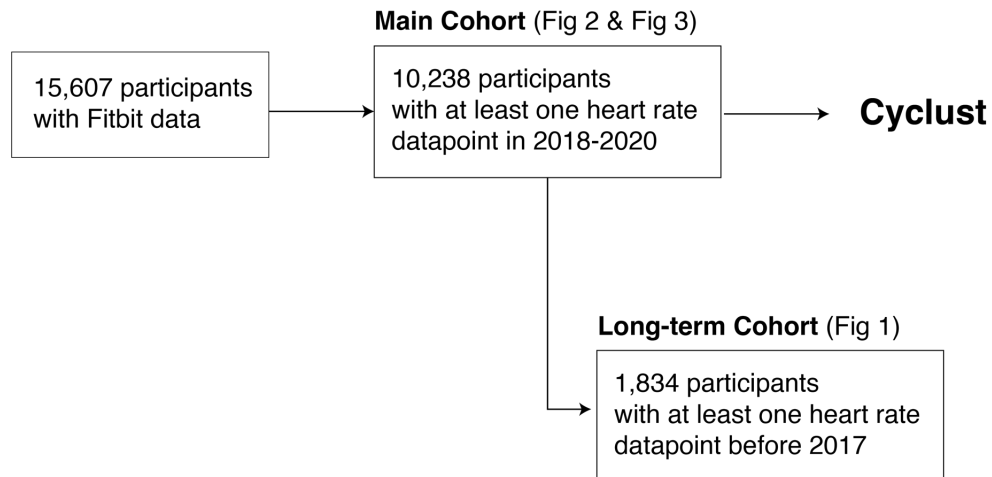

**Extended Data Figure 2:** Mean overall wear fraction of the long-term cohort (N=1,834) on federal holidays, and on the same day of the week in the 4 weeks preceding and following each holiday. Federal holidays included Martin Luther King Jr. Day, Presidents Day, Memorial Day, Independence Day, Labor Day, Columbus Day, Veterans Day, Thanksgiving, and Christmas. On each holiday, the population has a tendency to wear their devices less compared to the same day of the week in the vicinity of the holiday. Only MLK Jr day has a different trend, but being in early January, this is attributable to the increase in wear at the beginning of every year.

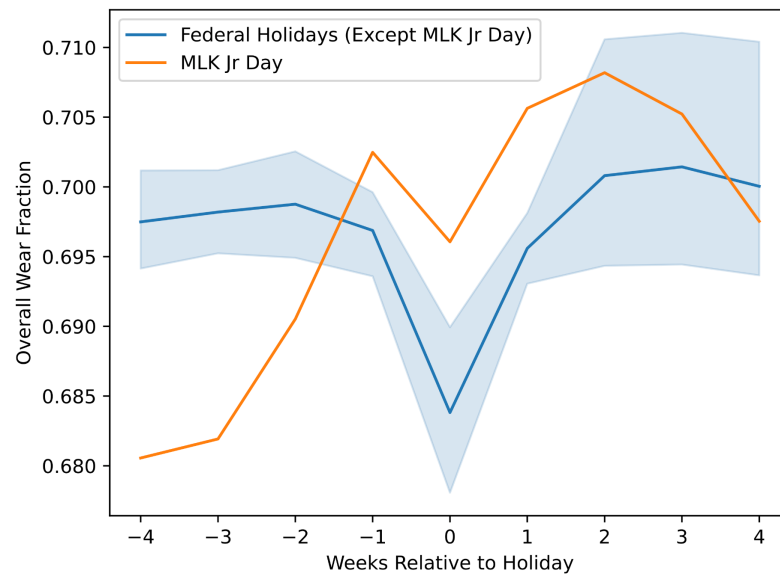

**Extended Data Figure 3:** Grouping similar circadian patterns that were originally separated by the unsupervised agglomerative clustering algorithm. The final clusters presented in Figure 2B are a result of merging each of the boxed clusters together and recalculating the centroid. It should be noted that the non-habitual groups present in Figure 2B were excluded from this analysis.

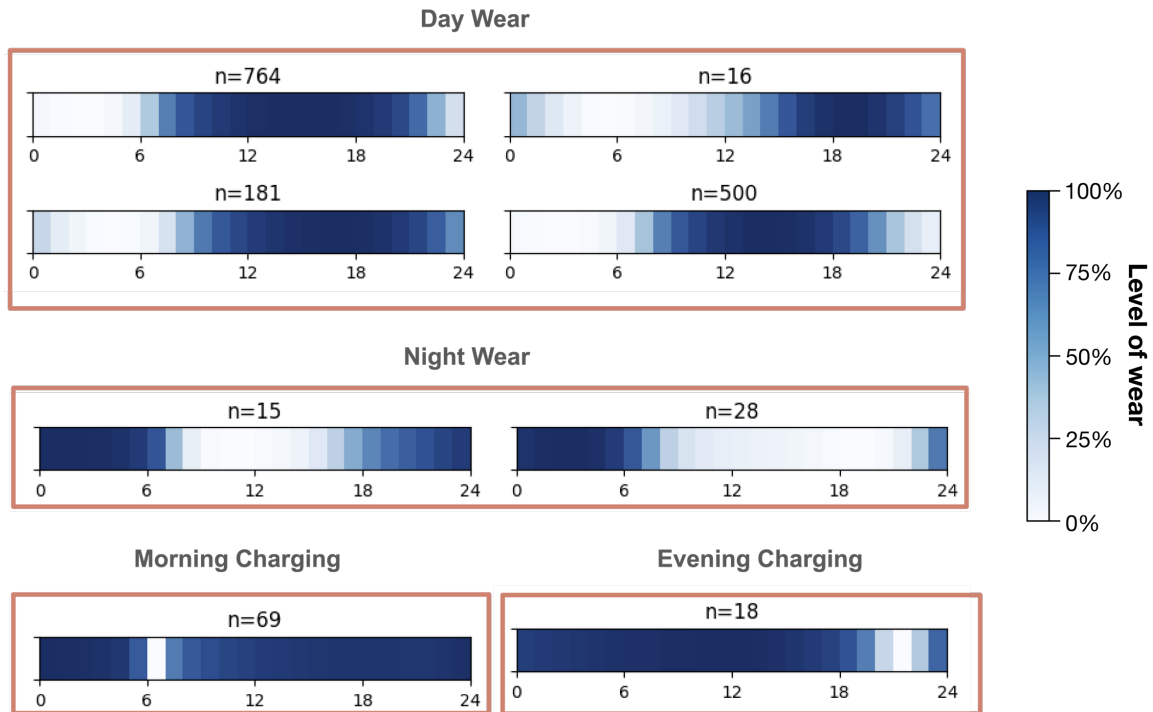



#### Extended Data Figure 4: Algorithm steps for extracting circadian and weekly wear patterns.

First, a binary indicator vector for whether the watch is worn is generated at a 15-minute resolution, then down-sampled to hour-level fractional wear. Next the vector is reshaped into a matrix such that each day occupies one row in the matrix. For the circadian wear pattern, this matrix is aggregated along the day axis to get the average wear level at each hour of the day, then normalized to mean 0 and standard deviation 1. For the weekly wear pattern, the matrix is further reshaped into a tensor which is a stack of matrices that each represent one week of days. The tensor is then aggregated along the week axis to get the average wear level at every given hour of the day on every given day of the week.

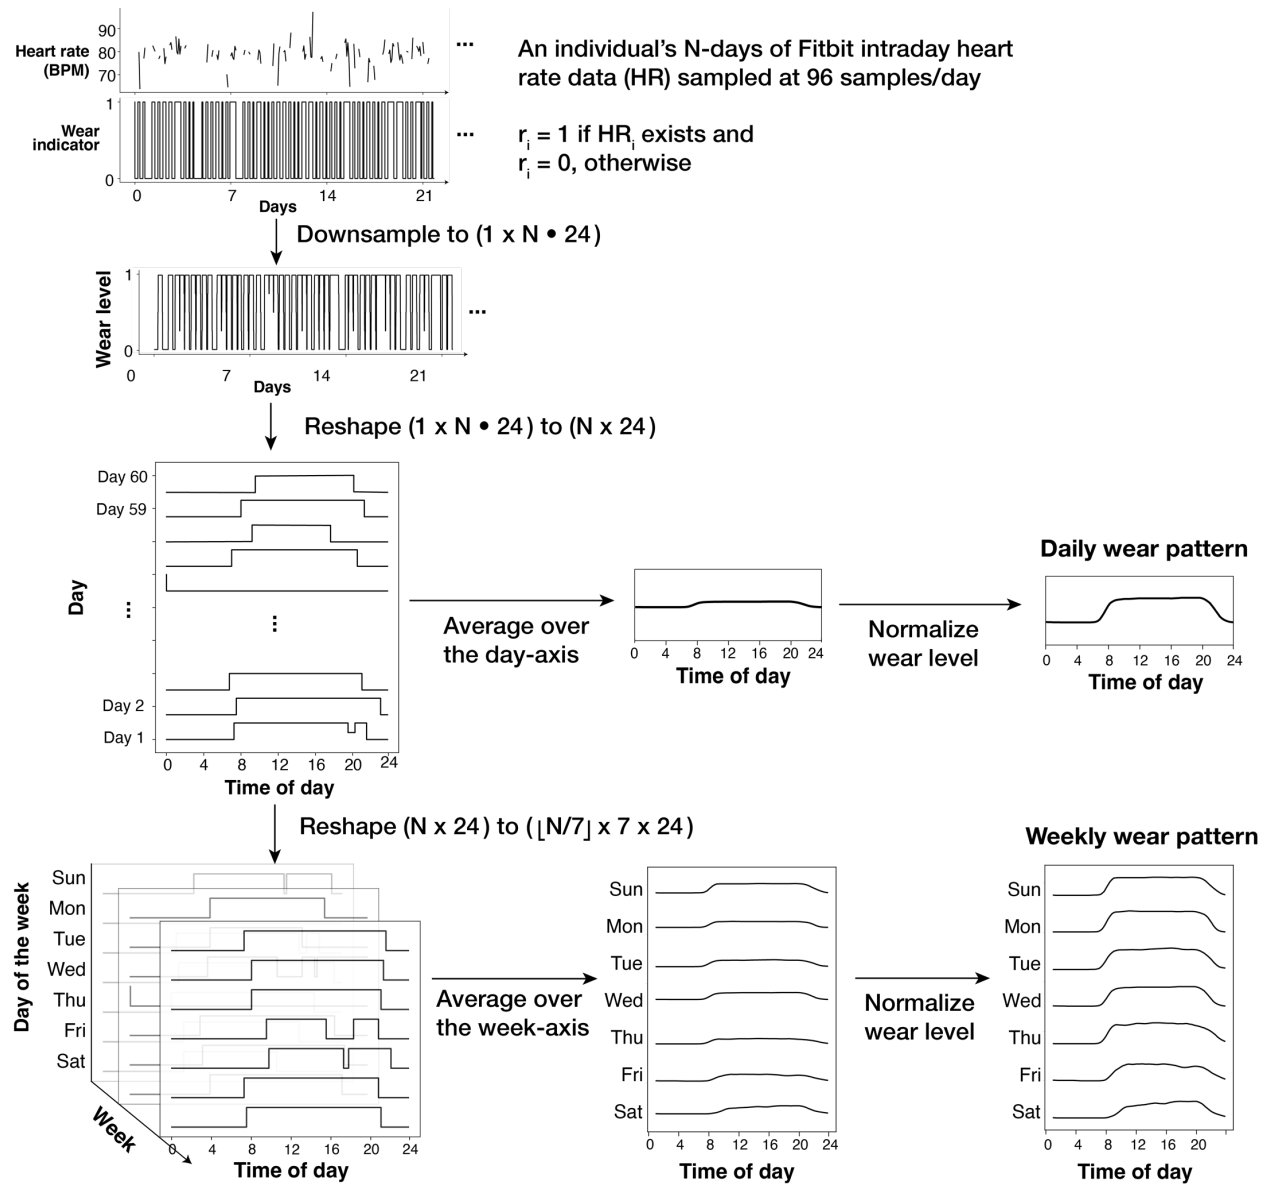

**Extended Data Figure 5. Weekday-weekend consistency.** The circadian and weekly consistency metrics are defined as the difference between the maximum and minimum values in an individual's circadian or weekly pattern vector (prior to normalization), respectively. Examples include: **(A)** an individual with high average wear level (more wear than non-wear days) but low consistency due to the differences in their timing and duration of wear; **(B)** an individual with low average wear levels (more non-wear than wear days) and low consistency; **(C)** an individual with high average wear levels and high consistency from wearing their device at consistent times; and **(D)** an individual with high weekly consistency from consistently wearing their device at similar times across all days of the week.

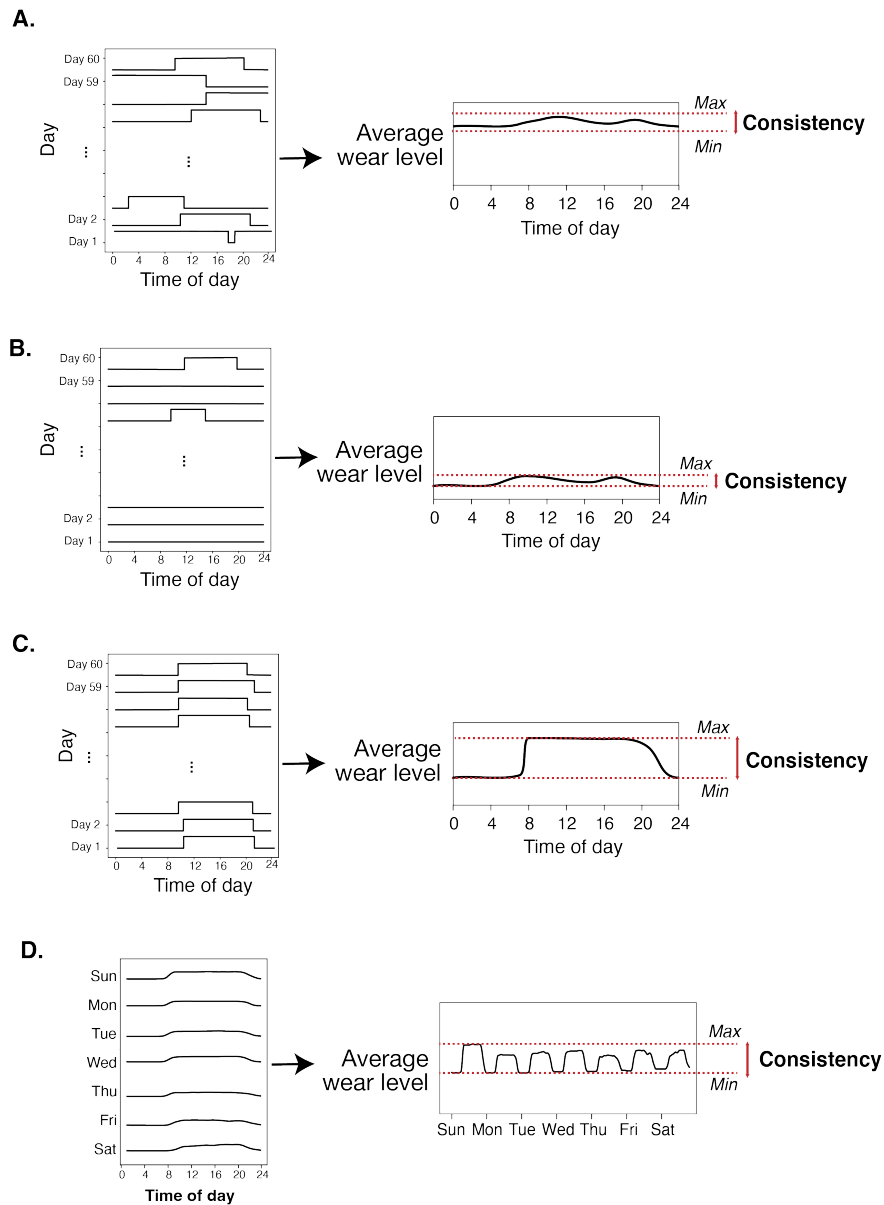

Supplement: Supplementary file 1 [file 0890b2fae7d97c892065bda6.pdf]
